## Articles of interest in other COB journals

### From *Journal of Cell Science*

#### **A germline-specific isoform of eIF4E (IFE-1) is required for efficient translation of stored mRNAs and maturation of both oocytes and sperm**

Melissa A. Henderson, Elizabeth Cronland, Steve Dunkelbarger, Vince Contreras, Susan Strome and Brett D. Keiper

Henderson, M. A. et al. 2009. *J. Cell Sci.* doi:10.1242/jcs.046771

#### **Attenuation of Notch signalling by the Down-syndrome-associated kinase DYRK1A**

Javier Fernandez-Martinez, Eva M. Vela, Mireille Tora-Ponsioen, Oscar H. Ocaña, M. Angela Nieto and Juan Galceran

Fernandez-Martinez, J. et al. 2009. *J. Cell Sci.* doi:10.1242/jcs.044354
